# Supplementary material
Source: MDPI journal article supplement (https://www.mdpi.com/2673-8112/3/5/47)
Supplement: s1 [file s1]

## Supplementary Material I

Private mutations identified from 743 samples by Nextclade. The number of mutations found at each position, locality, and biological advantages are shown.

| Genome                                              | Locality                                                                               | Mutations                                                                                                        | Advantages                                                                                                                                            |
|-----------------------------------------------------|----------------------------------------------------------------------------------------|------------------------------------------------------------------------------------------------------------------|-------------------------------------------------------------------------------------------------------------------------------------------------------|
| <b>Brazil/BA-58/2021 EPI_ISL_1067728 2021-01-08</b> | Brazil, Japan, USA, Italy, France, Netherlands, South Korea, Peru                      | <b>ORF1a:</b> S1188L; K1795Q<br><br><b>ORF1b:</b> P314L; E1264D                                                  | Not found in the literature                                                                                                                           |
| <b>Brazil/BA-50/2021 EPI_ISL_1067730 2021-01-26</b> | Brazil, Japan, USA, Italy, France, Netherlands, South Korea, Peru                      | <b>ORF1a:</b> K202R; K1795Q; P1862L<br><br><b>ORF1b:</b> P314L; E1264D                                           | Not found in the literature                                                                                                                           |
| <b>Brazil/BA-57/2021 EPI_ISL_1067736 2021-01-23</b> | Brazil, Japan<br><br>Brazil, Japan, USA, Italy, France, Netherlands, South Korea, Peru | <b>S:</b> L18F; T20N; P26S<br><br><b>ORF1a:</b> K202R; S1188L; K1795Q; P1862L<br><br><b>ORF1b:</b> P314L, E1264D | Decreases the susceptibility to bamlanivimab/etesevi mab monoclonal antibody treatments and neutralization for convalescent and post-vaccination sera |
| <b>Brazil/BA-51/2021 EPI_ISL_1067738 2021-01-26</b> | Brazil, Japan<br><br>Brazil, Japan, USA, Italy, France, Netherlands, South Korea, Peru | <b>S:</b> L18F; T20N; P26S<br><br><b>ORF1a:</b> K202R; S1188L; K1795Q; P1862L<br><br><b>ORF1b:</b> P314L, E1264D | Decreases the susceptibility to bamlanivimab/etesevi mab monoclonal antibody treatments and neutralization for convalescent and post-vaccination sera |

|                                                     |                                                                           |                                                                                             |                                                                                                                                                                                                                         |
|-----------------------------------------------------|---------------------------------------------------------------------------|---------------------------------------------------------------------------------------------|-------------------------------------------------------------------------------------------------------------------------------------------------------------------------------------------------------------------------|
| <b>Brazil/BA-53/2021 EPI_ISL_1067733 2021-01-23</b> | Brazil, Japan                                                             | <b>S:</b> L18F; T20N; P26S                                                                  | Decreases the susceptibility to                                                                                                                                                                                         |
|                                                     | Brazil, Japan, USA, Italy, France, Netherlands, South Korea, Peru, Turkey | <b>ORF1a:</b> T951I; S1188L; K1795Q<br><br><b>ORF1b:</b> P314L; E1264D                      | bamlanivimab/etesevi mab monoclonal antibody treatments and neutralization for convalescent and post-vaccination sera                                                                                                   |
| <b>Brazil/BA-55/2021 EPI_ISL_1067734 2021-01-23</b> | Brazil, Japan                                                             | <b>S:</b> L18F; T20N; P26S; D138Y; R190S; K417T; E484K; N501Y; D614G; H655Y; T1027I; V1176F | Decreases the susceptibility to treatments with                                                                                                                                                                         |
|                                                     | Brazil, Japan, USA, Italy, France, Netherlands, South Korea, Peru, Turkey | <b>ORF1a:</b> T951I; S1188L; K1795Q<br><br><b>ORF1b:</b> P314L; E1264D                      | bamlanivimab/etesevi mab monoclonal antibodies, decreases neutralization for convalescent and post-vaccination sera, and increases protein S affinity with ACE2, increasing its transmissibility and also its virulence |
| <b>Brazil/BA-52/2021 EPI_ISL_1067731 2021-01-26</b> | Brazil, Japan                                                             | <b>S:</b> L18F; T20N; P26S                                                                  | Decreases the susceptibility to                                                                                                                                                                                         |
|                                                     | Brazil, Japan, USA, Italy, France, Netherlands, South Korea, Peru         | <b>ORF1a:</b> K202R; S1188L; K1795Q; P1862L<br><br><b>ORF1b:</b> P314L; E1264D              | bamlanivimab/etesevi mab monoclonal antibody treatments and neutralization for convalescent and post-vaccination sera                                                                                                   |
|                                                     | Brazil, Japan, South Africa                                               | <b>S:</b> L18F; T20N; P26S; D138Y; R190S; K417T; E484K; N501Y; D614G;                       | Decreases the susceptibility to                                                                                                                                                                                         |

|                                                     |                                                                   |                                                                                                    |                                                                                                                                                                                                                                                                       |
|-----------------------------------------------------|-------------------------------------------------------------------|----------------------------------------------------------------------------------------------------|-----------------------------------------------------------------------------------------------------------------------------------------------------------------------------------------------------------------------------------------------------------------------|
| <b>Brazil/BA-49/2021 EPI_ISL_1067737 2021-01-26</b> | Brazil, Japan, USA, Italy, France, Netherlands, South Korea, Peru | H655Y; T1027I; V1176F                                                                              | treatments with bamlanivimab/etesevima monoclonal antibodies, decreases neutralization for convalescent and post-vaccination sera, and increases protein S affinity with ACE2, increasing its transmissibility and also its virulence                                 |
|                                                     |                                                                   | <b>ORF1a:</b> K202R; S1188L; K1795Q; P1862L<br><br><b>ORF1b:</b> P314L; E1264D                     |                                                                                                                                                                                                                                                                       |
| <b>Brazil/BA-59/2021 EPI_ISL_1067732 2021-01-18</b> | Brazil, Japan, South Africa, India                                | <b>S:</b> L18F; T20N; P26S; D138Y; R190S; A222V; K417T; E484K; N501Y; D614G; H655Y; T1027I; V1176F | Decreases the susceptibility to treatments with bamlanivimab/etesevima monoclonal antibodies, decreases neutralization for convalescent and post-vaccination sera, and increases protein S affinity with ACE2, increasing its transmissibility and also its virulence |
|                                                     | Brazil, Japan, USA, Italy, France, Netherlands, South Korea, Peru | <b>ORF1a:</b> S1188L; K1795Q; S2947N<br><br><b>ORF1b:</b> P314L; E1264D                            |                                                                                                                                                                                                                                                                       |
| <b>Brazil/BA-56/2021 EPI_ISL_1067735 2021-01-23</b> | Brazil, Japan                                                     | <b>S:</b> L18F; T20N; P26S                                                                         | Decreases the susceptibility to bamlanivimab/etesevima monoclonal antibody treatments and neutralization for convalescent and post-vaccination sera                                                                                                                   |
|                                                     | Brazil, Japan, USA, Italy, France, Netherlands, South Korea, Peru | <b>ORF1a:</b> S1188L; K1795Q; E3947T<br><br><b>ORF1b:</b> P314L; E1264D                            |                                                                                                                                                                                                                                                                       |

**Brazil/BA-LACEN-  
BA474/2021|EPI\_ISL\_  
3635671|2021-07-13**

Brazil, India

**Reversions:** T28877A;  
C28878G; A28881G;  
A28882G; C28883G;  
A29834T

Not found in the  
literature

**Unlabeled private  
mutations:** G680T;  
C6730T; C10156T;  
T10742C; T22738C;  
C22747T

**Brazil/BA-LACEN-  
148/2021|EPI\_ISL\_158  
3676|2021-03-05**

Brazil, India

**Reversions:** T28877A;  
C28878G; A28881G;  
A28882G; C28883G

Not found in the  
literature

**Unlabeled private  
mutations:** C12823T;  
C19662T; C21254T;  
T22738C

**Brazil/BA-LACEN-  
BA198/2020|EPI\_ISL\_  
3631208|2020-09-09**

Brazil, Africa, Europe,  
South America

**Reversions:** T3037C;  
T14408C

Not found in the  
literature

**Labeled private  
mutations:** C2749T;  
C12778T

**Unlabeled private  
mutations:** T9976C;  
A10760G; T12592C;  
T16370C; C17676T;  
G23309C; A23357G;  
G28429A

|                                                                                  |               |                                                                                                                                                                                                                                                               |                                |
|----------------------------------------------------------------------------------|---------------|---------------------------------------------------------------------------------------------------------------------------------------------------------------------------------------------------------------------------------------------------------------|--------------------------------|
| <b>Brazil/BA-FIOCRUZ-<br/>PVM54698/2021 EPI_I<br/>SL_2663286 2021-03-<br/>04</b> | Bahia, Brazil | <b>Labeled private<br/>mutations:</b> C12053T;<br>C22227T; C29311T                                                                                                                                                                                            | Not found in the<br>literature |
|                                                                                  |               | <b>Unlabeled private<br/>mutations:</b> G1659T;<br>T2827A; A3706T;<br>G4720A; C11300T;<br>G11743T; G18040T;<br>C19170T; T19605C;<br>G21770T; A22278G;<br>T24079C; G25947T;<br>C26873T; G27506T;<br>C27575T; A28084G;<br>C29095T; C29614T;<br>T29760C          |                                |
| <b>Brazil/BA-LACEN-<br/>BA303/2021 EPI_ISL_<br/>3255132 2021-05-17</b>           | Brazil, India | <b>Labeled private<br/>mutations:</b> C6402T;<br>G21786T; C21846T;<br>G21987A; A23063T;<br>C25416T; T26767C;<br>T27384C; C28253T;<br>G28916T                                                                                                                  | Not found in the<br>literature |
|                                                                                  |               | <b>Unlabeled private<br/>mutations:</b> C1912T;<br>G5180A; C9491T;<br>G9929A; G17019T;<br>T21568A; C21602A;<br>G23593T; A24369G;<br>C24904T; G25906T;<br>C27208T; C27978T;<br>G28141C; A28254C;<br>A28272G; T28877A;<br>C28878G; A28881G;<br>A28882G; C28883G |                                |

---

**Unlabeled private****mutations:** C12823T;

C19662T; C21254T;

T22738C

## Supplementary material II

Representation of epitope sequences and their HLA alleles among the analyzed SARS-CoV-2 genomes.

| Protein | Protein size | Peptide length | HLA Type | Peptide sequences                                                                                                                                                                                                                                                                                                                                                                                                                                                                                                                                                                                                                                                                                                                                                                                                                                                                                                                                                                                       |
|---------|--------------|----------------|----------|---------------------------------------------------------------------------------------------------------------------------------------------------------------------------------------------------------------------------------------------------------------------------------------------------------------------------------------------------------------------------------------------------------------------------------------------------------------------------------------------------------------------------------------------------------------------------------------------------------------------------------------------------------------------------------------------------------------------------------------------------------------------------------------------------------------------------------------------------------------------------------------------------------------------------------------------------------------------------------------------------------|
| ORF1ab  | 21.290       | 9-10           | HLA-A*02 | VMVELVAEL, TLSEQLDFI, FVFPLNSII, GLNDNLLEI, KLNEEIAII, FISTCACEI, KLVNKFLAL, MVTNNTFTL, PQLEMELTPV, FITESKPSV, VQEGVLTAV, ILGTVSWNL, YLATALLT, YVDNSSLTI, LATHGLAAV, KLINIIWFL, IIWFLLLSV, SLIYSTAAL, YLNSTNVTI, ILLLDQALV, YLITPVHVM, KACPLIAAV, FVVPGLPGT, FLPRVFSV, GVFCGVDAV, LLTNMFTPL, FLMSFTVLC, KVEGCMVQV, FLNGSCGSV, FLNRFTTTL, LLLTILTSL, FLLPSLATV, KLKDCVMYA, SMWALIISV, KLWAQCVQL, KMSVLLSVL, SLLSVLLSM, MLFTMLRKL, FVLALLSDL, LQAGNATEV, YLASGGQPI, NLLKDCPAV, TMADLVYAL, LLMPILTLT, FVNEFYAYL, RILGAGCFV, LMIERFVSL, YTACSHAAV, YVFCTVNAL, KVITGLHPT, TQAPTHLSV, NLSDRVVFV, CQVHGNAHV, AIMTRCLAV, ALLADKFPV, LLADKFPVL, MMISAGFSL, SLENVAFNV, SQMEIDFLEL, FLELAMDEFI, SQLGGLHLL, FELEDFIPM, MLWCKDGHV, TLIGDCATV, WQTGDFVKA, TVYEKLKPV, FELDERIDKV, TTIQTIVEV, YLKLTDNVYI, LLSAGIFGA, LLHKPIVWHV, FVVPGLPGTI, IVAGGIVAI, FLMSFTVLCL, KLRSDVLLPL, IQPGQTFSV, TTLNDFNLV, FMCVEYCPI, NTLQCIMLV, KMSDVKCTSV, MMILSDDAV, KQGDDYVYL, TLEPEYFNSV, YCQVHGNAHV, SQLGGLHLLI, ILSPLYAFA, WLTNIFGTV, |

AVIKTLQPV, MQVESDDYI, RTIKVFTTV,  
YPQVNGLTISI, WLMWLIINL, KLIEYTDFA,  
FTLKNTVCTV, YNLLKDCPAV, LVLSVNPYV,  
TLVPQEHYV, LMYKGLPWNV, KNLSDRVVFV,  
FELTSMKYFV, QVVSDIDYV, FLALCADSI,  
FLTENLLLYI, YMPYFFTLL, FGLVAEWFLA,  
FISNSWLMWL, KVTLVFLFV, FKLSYGIATV,  
YVYNPFMIDV, KQLPFFYYS, KMFDAYVNT,  
KQLIKVTLV, NLLTNMFTPL, YSFLPGVYSV,  
YLTNDVSFL, NVLAWLYAA, AVLDMCASL,  
ILTSLLVLV, FLCLFLLPSL, FLARGIVFM,  
FCLLNRYFRL, VLSFCAFAV, SVFNICQAV,  
KLVLSVNPYV, KLSYGIATV, LKQLPFFYYS,  
KQVVSIDIDYV, TQLCQYLNTL, WLPTGTLV,  
SLFDMSKFPL, RLIDAMMFT, GLVAEWFLA,  
SWLMWLIINL, KLIEYTDFA, VLAWLYAAV,  
TQWSLFFFL, FLYENAFLLP, TLMNVTLV,  
FSVAALTNNV, YNLWNTFTRL, YLVQQESPV,  
YVWKSYPVHV, FLAHIQWMV, VMCGGSLYV,  
KLMGHFAWWT, LMWLIINLV,  
WTLMNVTLV, AALLADKFPV, YLNTLTLAV,  
VMAYITGGV, CYLATALLTL, FVMMSAPPA,  
QLFFSYFAV, WLMWLIINLV, YVWKSYPVHV,  
LLFLMSFTV, NVLAWLYAAV, SMWALIISV,  
TVLSFCAFAV, YQNNVFMSEA, MLDMYSVML,  
QLEMELTPVV, QMAPISAMV, TLMNVTLVY,  
ISMWALIISV, YTMADLVYAL, GLALYPSA,  
ILFTRFFYV, FTYASALWEI, MVMCGGSLYV,  
LFLPSLATV, VVMAYITGGV, RSLPGVFCGV,  
TLLFLMSFTV, YLTNDVSFLA, WVMRIMTWL,  
YKLNVDYFV, YLDAYNMMI, ILFTRFFYV,  
VQMAPISAMV, YLTFYLTNDV,  
FLAHIQWMVM, FLLPSLATV,  
MMVTNNTFTL, YMPYFFTLL, YILFTRFFYV,  
STQWSLFFFL, YMPASWVMRI, TPVYSFLPGV,  
YTMADLVYA, SLFFFLYENA, AMSAFAMMFV,  
YTPHTVLQAV, QYLNTLTLAV,  
LYLDAYNMMI, MSAFAMMFV, MQLFFSYFA,  
YIFFASFYV, SFLAHIQWMV, ATVAYFNMV,  
IQWMVMFTPL, NTFSSFTNV, KYTMADLVYA,  
YLDAYNMMIS, MQLFFSYFAV, WMVMFTPLV,  
QWMVMFTPLV

HLA- SLVPGFNEK, GTCGLVEVEK, SEQLDFIDTK,  
A\*11 QMCLSTLMK, FSYVGCHNK, LLMPLKAPK,  
MVTNNTFTLK, RIDKVLNEK, HVVGPVNVN,  
SDIDITFLK, TQLGIEFLK, VMYMGTLSY,  
TTIKPVTYK, VVCTEIDPK, TSNSFDVLK,  
VVENPTIQK, RVCTNYMPY, ASMPTTIK,  
YIFFASFYY, SSTCMMCYS, GSIHLYFDK,  
QVVNVVTTK, GAMDTTSYR, HSMQNCVLK,  
SMQNCVLK, TSLSGFKL, SIDAFLNIK,  
SMQGAVDINK, ASGNLLLDK, TVKPGNFNK,  
MTNRQFHQK, HLMGWDYPK, CSLSHRFYR,  
MVMCGGSY, MSYYCKSHK, KLFAAETLK,  
YVFTGYRVTK, VSALVYDNK, SAQCFKMFY,  
CVDIPGIPK, NVAFNVVNK, SQDLSVVS,  
NQMCLSTLMK, VNINIVGDFK, TSAFVETVK,  
VETVKGLDYK, RVRSIFSR, VTNNTFTLK,  
VSDIDITFLK, LTAVVIPTK, TISLAGSYK,  
ALILAYCNK, TTIKPVTYK, TTIKNTVK,  
NSSTCMMCYS, VVTTKIALK, STDTCFANK,  
TTFDSEYCR, MVDTSLSGFK, TMLFTMLRK,  
GTSTDVVYR, AASGNLLLDK, QTVKPGNFNK,  
FAVSKGFFK, DKSAGFPFNK, KSAGFPFNK,  
SSNVANYQK, VVNARLRK, TVSALVYDNK,  
SAQCFKMFYK, AQCFKMFYK, VQMLSDTLK,  
AANTVIWDYK, CSMTDIKK, KSQDLSVVS,  
TEISFMLWCK, YICGFIQK, QTPFEIKLAK,  
STSAFVETVK, AVFDKNLYDK, SDIDITFLK,  
STQLGIEFLK, KASMPPTIAK, ASTDTCFANK,  
TANPKTPKYK, AAMQRKLEK, QTMLFTMLR,  
VIPDYNTYK, TVCTVCGMWK, KTNCCRFQEK,  
AVAKHDFK, SICSTMTNR, SVVNARLRK,  
SIINNTVYTK, GVCSMTDIK, KMQRMLLEK,  
IISDMYDPK, AQNSVRVLQK, NIFGTVYEK,  
GLLMPLKAPK, NVYLAVFDK, GARFYFYSK,  
TLSYEQFKK, ASMPTTIKN, STCMMCYSK,  
STFNVPMEKL, VDTANPKTPK, ALAYYNTTK,  
LVAIKNFK, FSSNVANYQK, YSYATHSDK,  
VSDIDYVPLK, LIISDMYDPK, VAYRKVLLRK,  
TNIFGTVYEK, QTFFKLVNK, VTHSKGLYRK,  
TNVYLAVFDK, VLTAVVIPTK, GTLSYEQFKK,  
YILFTRFFY, SGAMDTTSYR, KVLYFIK,  
VAGFAKFLK, AVKTQFNYYK, KTQFNYYK,  
SSYSLFDMK, VVNAANVYLK, LVSSFLEMK,  
ATAEAELAK, GVYSVIYLY, ALCTFLLNK,  
MQTMLFTMLR, VVIPDYNTYK,



KVAGFAKFLK, TMTNRQFHQK, ASQGLVASIK,  
 KLVSSFLEMK, AIMQLFFSY, NSQGLLPPK,  
 ATVVIGTSK, LTSMKYFVK, FVFPLNSIHK,  
 VQTFKLVNK, TVIEVQGYK, SSFLEMKSEK,  
 AGFSLWVYK, ATNNLVVMAY, AALCTFLLNK,  
 MNSQGLLPPK, QTMLFTMLRK,  
 VKTQFNYYKK, AVMYMGTLSY, FASFYYVWK,  
 CAMRPNFTIK, NVAFELWAK, AMDEFIERYK,  
 AVLDMCASLK, VVYRGTTTTYK, SAGFSLWVYK,  
 VNVADELWAK, ADQAMTQMYK,  
 AISDYDYR, GVAMPNLYK, LMNVLTLYK,  
 PTSFGPLVRK, PGVAMPNLYK, TTDPSFLGR,  
 SAFAMMFVK, ITPVHVMSK, AVDAAKAYK,  
 LITPVHVMSK, GTLSYEQFK, MYIFFASFY,  
 VMCGSLYVK, HLYLQYIRK, MGTLSEYQFK,  
 AYILFTRFFY, AAIMQLFFSY, ATVAYFNMVY,  
 RMYIFFASFY, SAFAMMFVKH,  
 MSAFAMMFVK, SVIYLYLTFY

|          |                                                                                                                                                                                                                                                                                                                                                                                                                                                                                                                                                                                                                                                                                                                                                                                                                                                                                                                                                                                                      |
|----------|------------------------------------------------------------------------------------------------------------------------------------------------------------------------------------------------------------------------------------------------------------------------------------------------------------------------------------------------------------------------------------------------------------------------------------------------------------------------------------------------------------------------------------------------------------------------------------------------------------------------------------------------------------------------------------------------------------------------------------------------------------------------------------------------------------------------------------------------------------------------------------------------------------------------------------------------------------------------------------------------------|
| HLA-A*24 | SYGADLKSF, YWVPRASANI, TFFKLVNKF,<br>GYKSVNITE, WSMATYYLF, LYDKLVSSF,<br>YYTSNPTTF, YYTSNPTTFH, YYHTTDPSE,<br>YYKDNSYF, DYKHYTPSF, ATYKPNTWCI,<br>TYKPNTWCI, TNYMPYFFTL, NYMPYFFTL,<br>KMFDAYVNTF, VFLFVAAIF, DYYRSLPGVF,<br>YYRSLPGVF, VYSVIYLYL, FYLTNDVSF,<br>FWITAIYIL, STKHFYWFF, LYQPPQTSI,<br>RFTTTLNDF, VQSTQWSLF, VYMPASWVM,<br>MFLARGIVF, RYFRLTLGV, RYMNSQGILL,<br>YYNTTKGGRE, IYNDKVAGE, YFVVKRHTF,<br>NFNKDFYDF, YYRYNLPTM, FYGGWHNML,<br>AYLRKHFSM, VYIGDPAQL, MYKGLPWNV,<br>DYVYNPFMI, YSYATHSDKF, SYATHSDKF,<br>LYLDAYNMM, DYTEISFML, KYTQLCQYL,<br>PYNMRVIHF, IQLSSYSLF, AYTRYVDNNF,<br>SYLFQHANL, EYKGPITDVF, TYPSETIQI,<br>LFFSYFAVHF, YFNKKDWYDF, IDYTEISFML,<br>PYPNASFDNF, ISTKHFYWFF, VQSTQWSLFF,<br>DYTEISFMLW, VPYNMRVIHF, RQWLPTGTLL,<br>QGYKSVNITE, IMQLFFSYF, NYLKRRVVF,<br>LYENAFLPFA, RYFKYWDQTY, VYKQFDTYNL,<br>LYKLMGHFAW, IDYKHYTPSF, AYILFTRFF,<br>HFISNSWLMW, TYERHSLSHF, YYSQLMCQPI,<br>IYLYLTFYL, QWMVMFTPL, MVYMPASWVM,<br>SYFVVKRHTF, YAYLRKHFSM, FDYVYNPFMI, |
|----------|------------------------------------------------------------------------------------------------------------------------------------------------------------------------------------------------------------------------------------------------------------------------------------------------------------------------------------------------------------------------------------------------------------------------------------------------------------------------------------------------------------------------------------------------------------------------------------------------------------------------------------------------------------------------------------------------------------------------------------------------------------------------------------------------------------------------------------------------------------------------------------------------------------------------------------------------------------------------------------------------------|

YYHTTDP SFL, TYKPNTWCIR, RMYIFFASE,  
 YYRSLPGVFC, LYENAF LPF, YYGNALDQAI,  
 RYMNSQGLLP, VFPPTSFGPL, SYSLFDMSKF,  
 VYQCAMRPNF, KFYGGWHNML,  
 VYRGTTTYKL, EWSMATYYLF, VYYTSNPTTF,  
 NYYKKDNSYF, RYVLMDGSII, TYASALWEI,  
 EYYHTTDP SF, YMGTL SYEQF, NYMPYFFTLL,  
 MYASAVVLL, WSMATYYLFD,  
 VYMPASWVMR, VWTLMNVLT L,  
 YYVWKS YVHV, TFYLTNDVSF, SNYLKRRVVF,  
 STQWSLFFF, RYNLPTMCDI, FFASFYYVW,  
 SVIYLYLTF, RYLALYNKY, TYKLNVDYF,  
 YYLFDES GEF, SFLPGVYSVI, SWVMRIMTW,  
 EYADV FHLYL, IYSTAALGVL, AYNMMISAGF,  
 VRMYIFFASE, IAMSAFAMMF, SYELQTPFEI,  
 TFTYASALW, LAYILFTRFF, VIYLYLTFYL,  
 TYASALWEIQ, RLYLDAYNMM, VVAFNTLLF,  
 IFFASFYYVW, AYVNTFSSTF, YSVIYLYLTF,  
 VMYASAVVLL, MYASAVVLLI

HLA-      ETSWQTGDF, QIVESCGNF, EIKESVQTF,  
 A\*26      FVTHSKGLY, YLFDES GEF, EVNSFSGYL,  
             EDIQLLKSAY, EIPKEEVKPF, FLTENLLLY,  
             ETKAIVSTI, GVVDYGARF, EAARYMRSL,  
             SSPDAVTAY, ETISLAGSY, TQVVDMSMTY,  
             QVVDMSMTY, EAVMYMGTL, CASEYTGNY,  
             YTGNYQCGHY, NTVKSVGKE, STNVTIATY,  
             DSAEVAVKM, YVNTFSSTF, YTPSKLIEY,  
             QTFSVLACY, LVYCFLGYF, STVLSFCAF,  
             FAVDAAKAY, NTVCTVCGM, TVCGMWKGY,  
             DTLKEILVTY, ENPDILRVY, FTEERLKL F,  
             FVVEVVDKY, TVVIGTSKF, DVD TDFVNEF,  
             YLRKHFSMM, AVVCFNSTY, FVSLAIDAY,  
             LTNDNTSRY, HVISTSHKL, CANGQVFGLY,  
             HYVRITGLY, EFSSNVANY, FKVNSTLEQY,  
             ETTADIVVF, EIVDTVSA L, MTYRR LISM,  
             EAIRHVRAW, DTYNLWNTE, ETICAPLTVF,  
             EAVKTQFNY, EIAILASF, ITILDGISQY,  
             EIVKFISTC, EGVVDYGARF, EIDPKLDNYY,  
             GLVAEWFLAY, TVKNGSIHLY,  
             DSAEVAVKMF, DAVNLLTNM, YIICISTKHF,  
             DTANPKTPKY, CTVCGMWKGY, VVIGTSKFY,  
             WVYKQFDTY, DSKEGFFTY, EEIAILASF,  
             ETAQNSVRV, DTVIEVQGY, GVVDYGARFY,  
             DAVTAYNGY, IETISLAGSY, DAVNLLTNMF,

MLVYCFLGYF, EAFEKMVSL, FAIGLALYY,  
 HSIGFDYVY, EAVKTQFNYY, AVKTQFNYY,  
 DLYKLMGHF, EAFLIGCNY, EIKESVQTFF,  
 DTVIEVQGYK, TIEVNSFSGY, DVFYKENSY,  
 YVLGLAAIM, EVAVKMFDAY, LIISVTSNY,  
 MVVIPDYNTY, DVVYRAFDIY, DIYNDKVAGF,  
 FVVEVVDKYF, MLTNDNSTRY,  
 FDTYNLWNTF, NTNPIQLSSY, DDTVIEVQGY,  
 EVARDLSLQF, ESSAKSASVY, MLVYCFLGY,  
 LFVVEVVDKY, DAVVCFNSTY, HTPAFDKSAF,  
 EVNEFACVV, ETISLAGSYK, QVVDMSMTYG,  
 SVPWDTIANY, EVVDKYFDCY, EIAILLASFS,  
 DVRETMSYL, DTIANYAKPF, EVARDLSLQ,  
 IVVTCLAYY, DVRETMSYLF, TVAYFNMVY,  
 TVVIGTSKFY, HFAIGLALYY, EAFEKMVSL,  
 EMVMCGGSLY, ITVNVLAWLY,  
 DIVKTDGTLM, EYADVFLY, FAIGLALYY,  
 EIVDTVLSALV, MTYRRLISMM, DFNVEFYAY,  
 DVFLYLYQY, ELTGHMLDM, EAARVRSIF,  
 ALIISVTSNY, DTTEAFEKM, DFNVEFYAYL,  
 ELTGHMLDMY, FLPGVYSVIY, TTYKLVNGDY,  
 TTDPSFLGRY, AAISDYDYY, STAALGVLM,  
 HVVAFNTLLF, TVAYFNMVYM, DVFLYLYQY

HLA- CMMCCKRNR, CYKRNRRAT, MTQMYKQAR,  
 A\*31 VAKHDFKFR, RYANLGER, RNYVFTGYR,  
 KYLPIDKCSR, KGLPWNVVR, RTCCLCDRR,  
 AVHECFVKR, RLIIRENNR, VAYRKVLLR,  
 KTLRKGR, KAIVSTIQR, GMPSTGYR,  
 LSTFISAAR, KFLKTNCCR, KTVQFCDAMR,  
 TTCCSLSHR, RLYECLYRNR, KYFVKIGPER,  
 VTHSKGLYR, SSTCMMCCKR, HFVNLDNLR,  
 AMTQMYKQAR, RNYVFTGYR,  
 RYPANSIVCR, WVLNNDYYR, CSLSHRFYRL,  
 ARVRSIFSR, KTPKYKFVR, LSWEVGKPR,  
 MCYKRNRRAT, RWVLNNDYYR,  
 TMMCCKRNR, LFCLLNRYFR, CCSLSHRFYR,  
 LSYGIATVR, TYNLWNTFTR, MSKFPLKLR,  
 AMRPNFTIK, VAFELWAKR, KLSYGIATVR,  
 VYRGTTTYK, YMPASWVMR, FVNEFYAYLR,  
 AMPNLYKMQR, AAISDYDYYR,  
 RYLALYNKYK, IFFASFYYV

HLA- ELEGIQYGR, DTKRGVCCR, STTNIVTR,  
 A\*33 NIVTRCLNR, LLQLCTFTR, DFDTWFSQR,

LYAAVINGDR, TVYDDGARR, MYPHISRQR,  
 TVQFCDAMR, YAIKAKNRAR, DYGDVVYR,  
 DMFLGTCRR, DVEGCHATR, YFVKIGPER,  
 NTVIWDYKR, QVDLFRNAR, FVTHSKGLYR,  
 ESKPSVEQR, TTEMLAKALR, TFTRSTNSR,  
 TFISDEVAR, NGDFLHFLPR, NFYGPVDR,  
 DFYDFAVSK, HTTCCSLSHR, TVREVLSDR,  
 HVGEIPVAYR, NTKHSSGVTR, TLLSLREVR,  
 CTFTRSTNSR, MPSYCTGYR, EFDRDAAMQR,  
 YYNTTKGGR, MFITREEAIR, YNLWNTFTR,  
 LAMDEFIER, DMSKFPLKLR, VLSTFISAAR,  
 SDLQDLKWAR, ELKINAACR, NTYLEGSVR,  
 FYWFFSNYLK, VTFQSAVKR, LYAFASEAAR,  
 ETMSYLFQH, FCLLNRYFR, DFAVSKGFFK,  
 FIKGLNNLNR, EFLTRNPAWR, YAFASEAAR,  
 FGADPIHSLR, LALYYPASR, DNLKTLLSLR,  
 HLSWEVGKPR, YWFFSNYLK, VTTVMFLAR,  
 DALFAYTKR, WFFSNYLKR, VTTVMFLAR,  
 MPNLYKMQR, SIKTIQPR, FFSNYLKRR,  
 NVAFELWAKR, LTLAVPYNMR, TLAVPYNMR,  
 NSIKTIQPR, YWFFSNYLKR, HTTDPSFLGR,  
 WFFSNYLKRR, VFHLYLQYIR, QMAPISAMVR,  
 TMADLVYALR, MADLVYALR

|              |                                                                                                                                                                                                                                                                                                                                                                                                                                                                                                                                                                                                                                                                                                                                                                 |
|--------------|-----------------------------------------------------------------------------------------------------------------------------------------------------------------------------------------------------------------------------------------------------------------------------------------------------------------------------------------------------------------------------------------------------------------------------------------------------------------------------------------------------------------------------------------------------------------------------------------------------------------------------------------------------------------------------------------------------------------------------------------------------------------|
| HLA-<br>B*07 | LPVLQVRDVL, VPHVGEIPV, IPVAYRKVL,<br>CPACHNSEV, APLLSAGIF, APYIVGDVV,<br>KPVETSNSF, KPNELSRVL, RANNTKGSL,<br>VPMEKLKTL, TPRDLGACI, IPLTTAAKL,<br>FPKSDGTGTI, VPHISRQRL, MPILTLTRAL,<br>FPPTSFGPL, RPPLNRNYVF, IPARARVECF,<br>RPQIGVREF, RNPAWRKAVF, NPAWRKAVF,<br>SPYNSQNAV, HPTQAPTHL, KPRSQMEIDF,<br>FPLKLRGTA, KPANNLSKI, KKNELSRVL,<br>MTPRDLGACI, MYPHISRQRL, RPPLNRNYV,<br>KPTETICAPL, TPSFKKGAKL, QPGQTFSVL,<br>LPYPDPSRIL, NPAWRKAVFI, TPAFDKSAF,<br>KPREQIDGYV, IPVAYRKVLL, YCPACHNSEV,<br>LPVNVAFEL, FPLKLRGTAV, NVPMEKLKTL,<br>IPLMYKGLPW, KPASRELKV, APHGHVMVEL,<br>LPFAMGIIAM, VPANSTVLSF, MPYFFTLILL,<br>RAMPNMLRIM, SPSGVYQCAM, RPNFTIKGSF,<br>TPAFDKSAFV, KFPLKLRGTA,<br>MPNLYKMQRM, TPHTVLQAV, APISAMVRM,<br>LPSLATVAYF, MPASWVMRI, MPASWVMRIM |
|--------------|-----------------------------------------------------------------------------------------------------------------------------------------------------------------------------------------------------------------------------------------------------------------------------------------------------------------------------------------------------------------------------------------------------------------------------------------------------------------------------------------------------------------------------------------------------------------------------------------------------------------------------------------------------------------------------------------------------------------------------------------------------------------|

HLA- NQMCLSTLM, RTIAFGGCVF, TIAFGGCVF,  
B\*15 ASFSASTSAF, LQKAAITIL, LTNIFGTVY,  
LASHMYCSF, YLKLTDNVY, ALNKATNNAM,  
LLKSAYENF, RTNVYLAVF, NLYDKLVSSF,  
VSSPDAVTAY, FLKRGDKSVY, MSMTYGQQF,  
YLVQQESPF, LGMPSYCTGY, VQMAPISAM,  
SSAKSASVY, QLIKVTLVF, RDIASDTDCF,  
RTTNGDFLHF, AIVVTCLAY, VMFTPLVPF,  
YQCAMRPNF, AMSAFAMMF, ILMTARTVY,  
LLAKDTTEAF, LAKDTTEAF, RQALLKTVQF,  
LVYAADPAM, NLDKSAGFPF, LQHRLYECLY,  
HMLDMYSVM, KLVLSVNPY, LTKGTLEPEY,  
YQVNGYPNMF, FMIDVQQWGF,  
SQAWQPGVAM, GQINDMILSL, KSYELQTPF,  
CNQMCLSTLM, KSILSPLYAF, KEIKESVQTF,  
GQSTQLGIEF, RVCTNYMPYF, LSVCLGSLIY,  
LLIRKSNHNF, LVQSTQWSLF, LILMTARTVY,  
LMNVLTLYVY, FLGYFCTCYF, HKLVLSVNPY,  
LQNYGDSATL, KQIVESCGNF, EQKSILSPLY,  
AQYELKHGTF, KQLIKVTLVF, FVRIQPGQTF,  
VVRQCSGVTF, LQCIMLVYCF, ATLQAIASEF,  
ATTAYANSVF, LVKQGDDYVY,  
FPLCANGQVF, LQEFKPRSQM, HSYGADLKSF,  
LPQNAVVKIY, WLTNIFGTVY, KLVSSFLEM,  
SSAKSASVYY, LVFLFVAAIF, LTQYNRYLAL,  
FSGAMDTTSY, IQPGQTFSVL, ILSDDAVVCF,  
RLMKTIGPDM, VTIDYTEISF, MMSAPPAQY,  
LMSNLGMPSY, RVVTTFDSEY, FGEYSHVVAF,  
GQTFSVLACY, VLYYQNNVF, LMKTIGPDME,  
KLASHMYCSF, LWVYKQFDY,  
ADLYKLMGHF, LASHMYCSFY, VLMDGSIIQF,  
FSNSGSDVLY, MMFVKHKHAF, IMLVYCFLGY,  
LPQLEQPYVF, LVQQESPFVM, YSGVVTTVMF,  
FMCVEYCPIF, SVLYYQNNVF, LAMDEFIERY,  
TLMIERFVSL, MVMFTPLVPF, TQYNRYLALY,  
VMFLARGIVF, FSSLPSYAAF, AVVYRGTTTTY,  
ISAGFSLWVY, NMMVTNNTF, GIIAMSAFAM,  
LVQMAPISAM, ASFYVWWSY, LLFLMSFTVL,  
AMGIIAMSAF, MLRIMASLVL, TQWSLFFFLY,  
LLVYAADPAM, MMISAGFSLW, LLPSLATVAY,  
VMMSAPPAQY, AMVRMYIFF, AIMQLFFSYF,  
ASEFSSLPSY, ADLVYALRHF

HLA- HVGEIPVAY, YPVASPNEC, YSLRLIDAM,  
 B\*35 LATNNLVVM, TPVCINGLM, VVVNAANVY,  
 LVSDIDITF, VPTDNYITTY, YPGQGLNGY,  
 YGQQFGPTY, YVLPNDDTL, FNPPALQDAY,  
 YPNASFDNF, VPWDTIANY, MSNLGMPSY,  
 VAVKMFDAY, LPFKLTCAT, FSAVGNICY,  
 SIIQFPNTY, VVTTFDSEY, FSNSGSDVL,  
 HVICTSEDM, TANPKTPKY, FFFLYENAF,  
 MGIIAMSAF, MFVKHKHAF, MCVEYCPIF,  
 MADQAMTQM, VVIPDYNTY, TCDGTTFTY,  
 CTDDNALAY, TGTSTDVVY, AALTNNVAF,  
 FAQDGNAAL, SSGDATTAY, YASQGLVAS,  
 HPNQEYADV, FVLTSHTVM, YPTLNISDEF,  
 HVASCDAM, IPMDSTVKNY, QAWQPGVAM,  
 VAMPNLYKM, IAFGGCVFSY, LAVFDKNLY,  
 HPDSATLVS, NPPALQDAY, LAAVNSVPW,  
 DASGKVPY, IIAMSAFAM, VVYRGTTTY,  
 IPGIPKDMTY, YPANSIVCRE, LALGGSVAI,  
 MPVCVETKA, NALDQAISM, MSYEDQDAL,  
 FAWWTAFVT, LPLTQYNRY, IAMSAFAMM,  
 MPLSAPTLV, NTLTLAVPY, FPVLHDIGN,  
 NPHLMGWDY, LATVAYFNM,  
 AFAVDAAKAY, QPITNCVKM, LPSLATVAY,  
 MADQAMTQMY, FAVDAAKAYK,  
 MPNMLRIMA, MAAYVDNSS, LPFAMGIIA,  
 LAAIMQLFF, TPVYSFLPG, LAHIQWMVM,  
 LALYNKYKY, NAAISDYDY, MAPISAMVRM,  
 LPSYAAFAT, LPGVYSVIY

HLA- FEIKLAKKF, GECPNFVFPL, CEFCGTENL,  
 B\*40 SEVGPEHSL, AEYHNESGL, KEKVNINIV,  
 GDFKLNEEL, GEQKSILSPL, CEIVGGQIV,  
 EETGLLMPL, GETLPTEVL, TEVLTEEVV,  
 LEQPTSEAV, NEKCSAYTV, SELLTPLGI,  
 MELTPVVQT, HEVLLAPLL, REMLAHAEET,  
 IELKFNPPAL, GEAANFCAL, VETSNSFDV,  
 REGYLNSTNV, AELAKNVSL, REVGFFVPG,  
 LEGSVAYESL, SEAGVCVST, GEYSHVVAF,  
 FEEAALCTF, LEGNFYGP, YENAFLPFAM,  
 SEFDRDAAM, KEILVTYNC, SEAKCWTET,  
 HEFCSQHTM, REVLSREL, RELHLSWEV,  
 LEPEYFNSV, SEYDYVIFT, EELFYSYAT,  
 QEFKPRSQM, MEIDFLELAM, REQIDGYVM,  
 HEHEIAWYT, VESCGNFKV, REETGLLMPL,  
 SEAVEAPLV, LEFGATSAAL, LEMELTPVV,

YENFNQHEV, YENFNQHEVL, QEGVLTAVV,  
 YEQFKKGVQI, YELKHGTFT, YKENSYTTTI,  
 VETSNSFDVL, IEYTDFA, FEEAALCTFL,  
 ADIVVFDEI, REFLTRNPA, VDWITIEYPI,  
 IEYPIIGDEL, IEELFYSYA, LENVAFNVV,  
 TETICAPLTV, KEGQINDMI, WEIVKFIST,  
 TENLLLYIDI, IELKFNPPA, VEAVMYMGTL,  
 YELKHGTFTC, SEYKGPITDV, AEVAVKMFDA,  
 REVGFVVPGL, VELKHFFFA, DRELHLSWEV,  
 WEVGKPRPPL, CEKALKYLP, AEIVDTVSA,  
 REAVGTNLPL, KEGFFTYIC, SEYTGNYQC,  
 KENSYTTTI, RELKVTFPP, AEAELAKNV,  
 EEAALCTFL, VEYCPIFFI, REFLTRNPAW,  
 FENKTTLPV, LELAMDEFI, WEIVKFISTC,  
 KESVQTFKL, MELTPVVQTI, QHEVLLAPLL,  
 QIELKFNPPA, IEYTDFA, KEILVTYNCC,  
 SVELKHFFFA, HEFCSQHTML, SLENVAFNVV,  
 TENLLLYID, GEVITFDNL, AGEAANFCAL,  
 YERHLSHFV, MEKLKTLVA, FEKMSLLSV,  
 AEIVDTVSA, GEIPVAYRKV, TEVNEFACV,  
 GEFKLASHM, HEVLLAPLLS, RELKVTFPPD,  
 EAELAKNVSL, EEAALCTFL, YENAFPLFA,  
 QEYADVFL, MDEFIERYKL, IEVQGYKSV,  
 TEVNEFACVV, GEAANFCAL, MEKLKTLVAT,  
 AELAKNVSLD, VEYCPIFFIT, YEAMYTPHT,  
 VREFLTRNPA, MEIDFLELA, NEFACVVADA,  
 LEMELTPVVQ, HEGKTFYVL, QESPFVMMSA,  
 YEAMYTPHTV, GEFKLASHMY, CVEYCPIFFI,  
 TEAFKMSVSL, EETFKLSYGI, RELHLSWEVG,  
 QMEIDFLELA, YELQTPFEI, DEWSMATYYL,  
 SHEGKTFYVL, HEGKTFYVLP, IERFVSLAI,  
 SGFKLASHM, FEYYHTTDP, LEQYVFCTV,  
 VEAFFEYYHTT, SEFSSLPSY, SEMVMCGGSL,  
 TERSEKSYEL, MIERFVSLAI, NQEYADVFL,  
 QEYADVFLY, TLEQYVFCTV, YELQTPFEIK,  
 SEFSSLPSYA, NEYRLYLDA, ANEYRLYLDA

|          |                                                                                                                                                                                                                                                                                                   |
|----------|---------------------------------------------------------------------------------------------------------------------------------------------------------------------------------------------------------------------------------------------------------------------------------------------------|
| HLA-B*44 | REHEHEIAW, KEGATTCGY, VETVKGLDY,<br>YEKLKPVLDW, NEFACVVAD, EEFEPSTQY,<br>YEYGTEDDY, REVRTIKVF, TELEPPCRF,<br>AESHVDL, FELTSMKYF, KENDSKEGF,<br>CREHEHEIAW, EEIAILLAS, EEFEPSTQY,<br>IEVNSFSGY, QEILGTVSW, VENPDILRVY,<br>EERLKLFDY, EEAIRHVRW, GFELTSMKYF,<br>REHEHEIAWY, EEFEPSTQYE, IEVNSFSGYL, |
|----------|---------------------------------------------------------------------------------------------------------------------------------------------------------------------------------------------------------------------------------------------------------------------------------------------------|

KQEILGTVSW, TEIDPKLDNY, SEDMLNPNY,  
 DEFSSNVANY, HECFVKRVDW,  
 QEILGTVSWN, VENPHLMGW, SEAFLIGCNY,  
 MDNSPNLAW, YTEISFMLWC, DEWSMATYY,  
 DEISMATNY, FDEISMATNY, RETMSYLFQH,  
 YEDQDALFAY, DVENPHLMGW,  
 DEISMATNYD, VENPHLMGWD,  
 SEAAARVRSI, LDEWSMATYY, GEYSHVVAFN,  
 NEYRLYLDAY, ADVFHLYLQY

HLA- FASEAARVV, KSVNITFEL, ITFDNLKTL,  
 B\*46 GTFTCASEY, TAFGLVAEW, VARDLSLQF,  
 YTNDKACPL, IAAVITREV, FLHFLPRVF,  
 TLQCIMLVY, SSLPSYAAF, RAMPNMLRI,  
 VGSDNVTDF, ITHDVSSAI, VSIINNTVY,  
 TTLPVNVAF, YSLFDMSKF, YSGVVTTVM,  
 KSEFDRDAAM, YASQGLVASI, TAAKLMVVI,  
 FSTVFPPTSF, TAFGLVAEWF, NYSGVVTTVM,  
 IGFDYVYNPF, VAIVVTCLAY,  
 KMADQAMTQM, DLATNNLVVM,  
 SAMVRMYIF, LAKDTTEAFE, YLFDESGEFK,  
 EKSVELQTPF, VMFTPLVPFW, KSYELQTPFE

HLA- LPVLQVRDV, MAYITGGVV, SAFYILPSI,  
 B\*51 FPDNLGDDV, LAWLYAAVI, EPLTQDHVDI,  
 FAYTKRNV, CPAEIVDTV, LPKGIMMNV,  
 YLPQNAVVKI, LPTEVLTEEV, FACVVADAV,  
 IPKEEVKPI, NPQDQSSY, VPYCYDTNVL,  
 TPGSGVPVV, YLPIDKCSRI, LPWNVVRKI,  
 VPVSIINNTV, LPQNAVVKI, MPLKAPKEI,  
 MPLKAPKEI, LKPANNLSKI, INPTDQSSY,  
 PVPYCYDTNV, VPYCYDTNV, YLPYPDPSRI,  
 LPIDKCSRI, LPETTADIV, SPFELEDFI,  
 LNPYEDLLI, VPQEHYVRI, YPIIGDELKI,  
 LALCADSII, LMPLKAPKEI, MPTTIKNTV,  
 LGPLSAQTGI, MPILTLTRA, LVPQEHYVRI,  
 LPIDKCSRII, TPVVQTIEV, MPVCVETKAI,  
 FPNTYLEGSV, TPKYKFVRI, FPLCANGQV,  
 LAVPYNMRV, LTPVVQTIEV, VPMEKLKTLV,  
 LPLTQYNRYL, VLAWLYAAVI, SPNLAWPLI,  
 LPYPDPSRI, EAMYPHTV, ISPYNQNAV,  
 FLALCADSII, VMPLSAPTLV, LALCADSIII,  
 FPLNSIIKI, MPLSAPTLVP, LALYPSARI,  
 TALLTLQQI, FSYFAVHFI, FPPTSFGPLV,



VLPQLEQPYV, LPQLEQPYV, YASAVVLLI,  
MPYFFTLLLQ, MVYMPASWV

HLA- VQLSLPVLQV, CGYLPQNAV, LDYKAFKQI,  
B\*52 NQTTTIQTI, SAFYILPSII, RSLKVPATV,  
EQFKKGVQI, LSVCLGSLI, DTYPSELETI,  
TQYNRYLAL, VMYASAVVL, SNYQHEETI,  
FELWAKRNI, VDIAANTVI, IAKKPTETI,  
CQYLNTLTL, RQWLPTGTL, LSLREVRTI,  
KVFTTVDNI, LDTYPSLETI, MQNCVLKLV,  
CAMRPNFTI, VGFTLKNTV, MGHFAWWTAF,  
CALAPNMMV, VETKAIVSTI, RVFSAVGNI,  
FQSAVKRTI, THHWLLLTI, HAFLCLFLL,  
VAFNTLLFL, TQFNYYKKV, SQNAVASKI,  
ASLNGVTLLI, FFSYFAVHFI, NAFLPFAMGI,  
TSMKYFVKI, LCQYLNTLTL, NSWLMWLII,  
LTNMFTPLI, QAISMWALI, YKQFDTYNLW,  
KSAFYILPSI, QAISMWALII, NSYFTEQPI,  
KQFDTYNLW, SNSWLMWLII, LAVPYNMRVI,  
INLVQMAPI, RAFGEYSHV, RAFGEYSHVV,  
ISAMVRMYI

HLA- KPTVVVNAA, IPCTCGKQA, YGPFVDRQTA,  
B\*54 IPTTCANDPV, NPYVCNAPG, VPVSIINNT,  
VKPTVVVNAA, MPTTIAKNT, LPINVIVFDG,  
CPRHVICTS, FYPKLQSSQA, CPNFVFPLN,  
LPFKLTCATT, CVPLNIIPLT, YPKLQSSQA,  
LPGGIMMNVA, LVPHVGEIPV, CPNFVFPLNS,  
VPNQPYRNA, MPSYCTGYRE, NLPFKLTCAT,  
FPNTYLEGS, QPIGALDISA, FTPFDVVRQC,  
VPLNIIPLT, GFPHVGEIPV, VPHVGEIPVA,  
LVPNQPYRNA, CPLIAAVIT, MGHFAWWTA,  
FFPDLNGDVV, FCAFAVDAA, SPYNSQNAVA,  
LPFFYYSDS, VPWDTIANYA, LMPILTLTRA,  
LPFFYYSDSP, SPLYAFASEA, LMPVCVETKA,  
FPDLNGDVVA, LPPKNSIDA, FPLNSIIKT,  
YPSARIVYTA, FFYVLGLAA, CPIFFITGNT,  
AMPNMLRIMA, FLPFAMGIIA,  
MPNMLRIMAS, FSSLPSYAA, FAMGIIAMSA,  
LTPVYSFLPG, SPFVMMMSAP, LDAYNMMISA,  
MVRMYIFFAS, LPSYAAFATA

HLA- RAGKASCTL, TAQNSVRVL, YITGGVVQL,  
C\*01 IIFLEGETL, VADAVIKTL, KTLQPVSEL,  
VVNAANVYL, FGADPIHSL, CVEEVTTTL,  
TVASLINTL, SAPPAQYEL, ILKPANNL,

YSTAALGVL, SLPINVIVE, SASVYYSQL,  
 VAKSHNIAL, LMDGSIIQF, MLNPNYEDL,  
 LVQAGNVQL, LSAQTGIAV, SAQTGIAVL,  
 FVKHKHAF, WTLMNVLTL, IFFITGNTL,  
 TTFTYASAL, ISMDNSPNL, STVFPPTSF,  
 HAASGNLLL, AVTANVNAL, IADKYVRNL,  
 YADVHLYL, YIRKLHDEL, AMYTPHTVL,  
 ISTSHKLV, VMPLSAPTL, RITGLYPTL,  
 VGMQKYSTL, ISMATNYDL, QLPAPRTL,  
 KTIGPDMFL, IVQMLSDTL, LSDRVVFVL,  
 SLYVNKHAF, SAFVNLKQL, VSDIDYVPL,  
 SVGPKQASL, QASLNGVTL, YGDFSLSQL,  
 LFDMSKFPL, KAPKEIIFL, IANYAKPFL,  
 HSLSHFVNL, FSTFEEAAL, YLKLRSDVL,  
 CVPLNIPL, IAATRGATV, NTFTRLQSL,  
 TSNPTTFHL, IIQFPNTYL, HANEYRLYL,  
 LVATAEAE, YSDVENPHL, VTANVNALL,  
 YIFWRNTNPI, AMPNMLRIM, AAYVDNSSL,  
 IVDTVSAVL, FLPGVYSVI, LTSHTVMPL,  
 MFDAYVNTE, MSAPPAQYEL, AIASEFSSL

HLA-  
 C\*03 HSSGVTREL, FCGPDGYPL, LKVGGSCL,  
 NLHPDSATL, YCNKTVGEL, YKKPASREL,  
 IATYCTGSI, GSIPCSVCL, YANGGKGFC,  
 GALDISASI, MAFPSGKVE, YKVYYGNAL,  
 YGNALDQAI, FRYMNSQGL, NARDGCVPL,  
 TALRANSV, FKEGSSVEL, HKPPISFPL,  
 YGIATVREV, EAVGTNLPL, FRNARNGVL,  
 QNYGDSATL, NASSSEAF, YCALAPNMM,  
 VTFGDDTVI, KATYKPNTW, LSMQGAVDI,  
 WSYGQSTQL, TACTDDNAL, AANFCALIL,  
 YVLMGDSII, MATNYDLSV, YFTEQPIDL,  
 YVYIGDPAQL, FSHSQLGGL, ALYYPASRI,  
 PAFDKSAFV, CSHAAVDAL, YAFASEAARV,  
 YAADPAMHA, HVVAFNTLL, MAAYVDNSSL,  
 FFLYENAF

HLA-  
 C\*07 ERSEKSYEL, SILSPLYAF, VRSIFSRTL,  
 FEPSTQYEE, WKYPQVNG, VRETMSYLF,  
 QYELKHGTF, YKGPITDVF, FYKENSYTT,  
 YFFTLLLQL, TRFFYVLGL, FYVLGLAAI,  
 FFSYFAVHF, HFISNSWLM, FYYVWKSIV,  
 YERHLSHF, SGKPVPCY, VYSFLPGVY,  
 FYWFFSNYL, LRSDVLLPL, QYNRYLALY,  
 YREAACCHL, IRKSNHNFL, VRIQPGQTF,

VRQCSGVTF, YFRLTLGVY, KYLYFIKGL,  
 FLKTNCCRF, FNKKDWYDF, YFKYWDQTY,  
 YHPNCVNCL, SYEDQDALF, LYYQNNVFM,  
 VYLPYPDPS, PYPDPSRIL, LYLQYIRKL,  
 YRGTTTYKL, YYP SARIVY, RLR AKHYVY,  
 YFNSVCRLM, KRVDWTIEY, EYRLYLDAY,  
 YYKKVDGVV, RFKESPFEL, GFFTYICGF,  
 YKLMGHFAW, GHFAWWTAF, WRNTNPIQL,  
 YKLVNGDYF, YYVWKSIVH, YYQNNVFMS,  
 LYYPSARIV, EYFNSVCRL, YHTTDP SFL,  
 NYYKKDNSY, FYAYLRKHF, DYDYRYNL,  
 YRYNLPTMC

HLA- FGDSVEEVL, FGDDTVIEV, FTTVDNINL,  
 C\*08 HTDLM AAYV, ISDEVARDL, YTDFATSAC,  
 LND FNLVAM, MSDVKCTSV, ANDPVGF TL,  
 LSDDAVVCF, WTNAGDYIL, FSTGVNLVA,  
 KVDGVDVEL, IATNGPLKV, YASAVVLLIL,  
 ISDEFSSNV, MVSLLSVLL, KVDGVVQQL,  
 VSDIDITFL, TSDLATNNL, YSDVENPHLM,  
 AADPAMHAA, LGLAAIMQL, ISAGFSLWV

HLA- YTRYVDNNF, YTVEEAKTV, YAKPFLNKV,  
 C\*12 FISAARQGF, FAMGIIAMS, YNMMISAGF,  
 YSTAALGVLM

HLA- YWVPRASAN, SFSASTSAF, VYEKLKPVL,  
 C\*14 KYCALAPNM, EFGATSAAL, DYIATNGPL,  
 NFNQHEVLL, LYIDINGNL, TTEMLAKAL,  
 YFYTSKTTV, SYSGQSTQL, KWADNNCYL,  
 YYRARAGEA, TLYCIDGAL, SYTTTIKPV,  
 KFADDLNQL, SFKKGAKLL, TIANYAKPF,  
 SYIVDSVTV, VYYSQLMCQ, CFANKHAD F,  
 WFSQRGGSY, PYCYDTNVL, AMKYNYEPL,  
 VYKVYYGNAL, NYSGVVTTV, EMLDN RATL,  
 TTPGSGVPV, FYDFAVSKGF, RKHTTCCSL,  
 SHFAIGLAL, QFKHLIPLM, VYNPFMIDV,  
 EYPIIGDEL, KFTDGVCLF, RYPANSIVC,  
 YYSDSPCES, YKQFDTYNL, FYPKLQSSQ,  
 LYKMQRMLL, MYDPKTKNV, GFIQQLAL,  
 AFLIGCNYL, TLQAIASEF, FFKEGSSVEL,  
 MFITREEAI, FDYVYNPFM, FYYSDSPCE,  
 QWLPTGTLL, FWRNTNPIQL, FYFYTSKTT,  
 RYVLM DGS I, TYLEGSRV, LFLMSFTVL,  
 SFLPGVYSV, SYREAACCH, TYHPNCVNC,  
 TYKLVNGDY, FFYSDSPC, IFWRNTNPI,

|  |  |  |  |                                                                                                                                                                                                                                                                                                                                                                                                                                                                                                                                                                    |
|--|--|--|--|--------------------------------------------------------------------------------------------------------------------------------------------------------------------------------------------------------------------------------------------------------------------------------------------------------------------------------------------------------------------------------------------------------------------------------------------------------------------------------------------------------------------------------------------------------------------|
|  |  |  |  | HFYWFFSNYL, SYREAACCHL, RYFRLTLGVY,<br>AYYNTTKGG, LYFIKGLNNL, YFIKGLNNL,<br>TYHPNCVNCL, FYTSKTTVA, SFYYVWKSJ,<br>MYLKLRSDV, MYLKLRSDVL, FRYMNSQGGL,<br>KFYGGWHNM, FIFYTSKTTV, TFDNLKTLL,<br>VYYGNALDQ, AMHAASGNL, MHAASGNLL,<br>VLYYQNNVFM, LYYP SARIVY, MYMG TLSYE,<br>HFYWFFSNY, DYYRYNLPTM, YVYIGDPAQ,<br>FYVLGLAAIM, YFVLTSHTV, SYFTEQPIDL,<br>KYTMADLVY, DYYRYNLPT, YYRYNLPTMC,<br>LYYDSMSYE, WFLNRFTTTL, EYYHTTDP S,<br>MYIFFASFY, FYLITPVHVM, FYLTNDVSFL,<br>QYVFCTVNAL, RLYLDAYNM, IYSTAALGV,<br>FYLITPVHV, VYYTSNPTT, ALYNKYKYF,<br>YFVLTSHTVM, AYVNTFSST |
|--|--|--|--|--------------------------------------------------------------------------------------------------------------------------------------------------------------------------------------------------------------------------------------------------------------------------------------------------------------------------------------------------------------------------------------------------------------------------------------------------------------------------------------------------------------------------------------------------------------------|

|       |      |      |          |                                                                                                                                                                                                                                                                                                                                                                                                          |
|-------|------|------|----------|----------------------------------------------------------------------------------------------------------------------------------------------------------------------------------------------------------------------------------------------------------------------------------------------------------------------------------------------------------------------------------------------------------|
| Spike | 3822 | 9-10 | HLA-A*02 | FVFLVLLPL, FQFCNDPFL, AVDCALDPL,<br>KLNDLCFTNV, KIADYNYKL, KLPDDFTGCV,<br>NQVAVLYQDV, YQDVNCTEV,<br>MQMAYRFNGI, RLQSLQTYV, YHLSMFPQSA,<br>FVSNNGTHWV, YIWLGFIAGL, GYLQPRTFLL,<br>FQTRAGCLI, FTISVTTEI, TQLNRALTGI,<br>VLNDILSR, HLMSFPQSA, KQYKTPPI,<br>KQLSSNFGA, YLQPRTFLL, FELLHAPATV,<br>FIEDLLFNKV, FIAGLIAIV, SIIAYTMSL,<br>YIKWPWYIWL, LQSYGFQPT, LLFNKVTLA,<br>FVFLVLLPLV, VVFLHVTYVb, SVTTEILPV |
|-------|------|------|----------|----------------------------------------------------------------------------------------------------------------------------------------------------------------------------------------------------------------------------------------------------------------------------------------------------------------------------------------------------------------------------------------------------------|

|  |  |  |          |                                                                                                                                                                                                                                                                                |
|--|--|--|----------|--------------------------------------------------------------------------------------------------------------------------------------------------------------------------------------------------------------------------------------------------------------------------------|
|  |  |  | HLA-A*11 | GVYFASTEK, GVYYHKNNK, CTLKSFTVEK,<br>GVLTESNKK, TEILPVSM TK, GSFCTQLNR,<br>VTLADAGFIK, SVLNDILSR, RASANLAATK,<br>SLIDLQELGK, CMTSCCCLK, TLKSFTVEK,<br>EILPVSM TK, SFIEDLLFNK, TLADAGFIK,<br>ASANLAATK, MTSCCCLK, FIEDLLFNK,<br>SSTASALGK, YNSASFSTFK, NSASFSTFK,<br>YLQPRTFLLK |
|--|--|--|----------|--------------------------------------------------------------------------------------------------------------------------------------------------------------------------------------------------------------------------------------------------------------------------------|

|  |  |  |          |                                                                                                                                                                                                                                                                                 |
|--|--|--|----------|---------------------------------------------------------------------------------------------------------------------------------------------------------------------------------------------------------------------------------------------------------------------------------|
|  |  |  | HLA-A*24 | YYHKNNKSW, VYAWN RKRI, LYNSASFSTF,<br>GNYNYLYRLF, CYFPLQSYGF, RYSTGSNVF,<br>KYEQYIKWPW, EQYIKWPWYI,<br>KWPWYIWLGF, NYNYLYRLF, YFPLQSYGF,<br>KWPWYIWL, IWLGFIAGLI, YNSASFSTF,<br>QYIKWPWYI, IYQTSNFRV, NYNYLYRLFR,<br>IYKTPPIKDF, QYIKWPWYIW, VYSTGSNVF,<br>VYSTGSNVFQ, PYRVVLSF |
|--|--|--|----------|---------------------------------------------------------------------------------------------------------------------------------------------------------------------------------------------------------------------------------------------------------------------------------|

|          |                                                                                                                                                                                                  |
|----------|--------------------------------------------------------------------------------------------------------------------------------------------------------------------------------------------------|
| HLA-A*26 | GWTAGAAAYY, WTAGAAAYYV, NTSNQVAVLY, SVASQSIIAY, EVFAQVKQIY, FVSNGTHWF, FIAGLIAIVMb, STQDLFLPF, EFVFKNIDGY, WTAGAAAYY, ESNKKFLPF, EILDITPCSF, EMIAQYTSAL, MIAQYTSAL, YTNSFTRGVY                   |
| HLA-A*31 | GVYYPDKVFR, KSWMESEFR, KQGNFKNLR, RFQTLALHR, AYYVGYLQPR, KGIYQTSNFR, QTNSPRRAR, GIYQTSNFR, GTHWFVTQR, VYYPDKVFR, KFLPFQQFGR, VYADSFVIR, RFASVYAWNR                                               |
| HLA-A*33 | FTRGVYYPDK, NGVGYQPYP, STGSNVFQTR, NGTHWFVTQR, YYVGYLQPR, NVYADSFVIR, YNYLYRLFR, NYLYRLFRK                                                                                                       |
| HLA-B*07 | NSPRRARSVA, SPRRARSVAS, SPRRARSVA, FPQSAPHGVV, LPVSMTKTSV, YPDKVFRSSV, IPTNFTISV                                                                                                                 |
| HLA-B*15 | HSTQDLFLPF, AQKFNGLTVL, TLVKQLSSNF, PQSAPHGVVF, AICHDGKAHF, SWMESEFRVY, SLGAENSVAY, LVKQLSSNF, QSAPHGVVF, LMSFPQSAPH, TNLCPFGEVF, STQDLFLPFF, ASFSTFKCY, LQPRTFLLKY                              |
| HLA-B*35 | LPPAYTNSF, FPNITNLCPE, HADQLTPTW, IAIVMVTIM, LPFFSNVTWF, FNATRFASVY, VASQSIIAY, LGAENSVAY, LPVSMTKTS, WPWYIWLGF, LPFFSNVTW, MSFPQSAPH, NATRFASVY                                                 |
| HLA-B*40 | CEFQFCNDPF, TFEYVSQPFL, FERDISTEI, VEGFNCYFPL, LEILDITPC, TEVPVAIHA, YECDIPIGA, FEYVSQPFLM, GEVFNATRFA, FELLHAPAT, AEIRASANL, MESEFRVYS, ESEFRVYSSA, SEFRVYSSA, FEYVSQPFL, AEIRASANLA, IEDLLFNKV |
| HLA-B*44 | GEVFNATRF, AENSVAYSN, QEVFAQVKQI, ADAGFIKQY, AAEIRASANL, QELGKYEQY, YEQYIKWPWY, TEKSNIIRGW, AENSVAYSNN, YEQYIKWPW                                                                                |
| HLA-B*46 | FTNVYADSF, NFTISVTTEI, IMLCCMTSC, FTISVTTEIL                                                                                                                                                     |

|   |     |      |          |                                                                                                                                                                                                           |
|---|-----|------|----------|-----------------------------------------------------------------------------------------------------------------------------------------------------------------------------------------------------------|
|   |     |      | HLA-B*51 | LLPLVSSQCV, LPPLLTDEMI, FPQSAPHGV, LPLVSSQCV, LPDDFTGCVI, IAIPTNFTI, VAYSNNSIAI, LPLVSSQCVN, WPWYIWLGFI                                                                                                   |
|   |     |      | HLA-B*52 | VTWFHAIHV, RGWIFGTTL, SIAIPTNFTI, RSFIEDLLF, KNFTTAPAI, RNFYEPQII, SNVTWFHAI, VGYQPYRVV, CDIPIGAGI, IANQFNSAI, LQTYVTQQLI, RVYSTGSNV, QTYVTQQLI, LGFIAGLIAI, MAYRFNGIGV, KQLSSNFGAI, VGYLQPRTE, SNFGAISSV |
|   |     |      | HLA-B*54 | FLPFFSNVTW, FSNVTWFHA, LCPFGEVFNA, LSFELLHAPA, IPIGAGICA, LIANQFNSA, CPFGEVFNA, CPFGEVFNAT, FPLQSYGFQP, FLHVTYVPA                                                                                         |
|   |     |      | HLA-C*01 | SALEPLVDL, LLALHRSYL, ITDAVDCAL, VIAWNSNNL, WTFGAGAAL, SLSSTASAL, VVNQNAQAL, VYDPLQPEL, TLDSKTQSL, AAAYYVGYL, YQPYRVVVL, SAPHGVVFL, VSQPFLMDL, IAQYTSALL                                                  |
|   |     |      | HLA-C*03 | FASTEKSNI, IVNNATNVV, YGFQPTNGV, MSLGAENSV, FCTQLNRAL, FIKQYGDCL, FCGKGYHLM, SANLAATKM, YKTPPIKDF, FGAGAALQI                                                                                              |
|   |     |      | HLA-C*07 | TRTQLPPAY, FKNLREFVF, TRFQTLLAL, VRFPNITNL, FYEPQIITT, YHKNNKSWM, GYQPYRVVV, HWFVTQRNF, YYPDKVFRS, YRFNGIGVT, PFFSNVTWF, TRFASVYAW, IKWPWYIWL, EYVSQPFLM                                                  |
|   |     |      | HLA-C*08 | NSYECDIPI, TSVDCCTMYI                                                                                                                                                                                     |
|   |     |      | HLA-C*12 | LVRDLPQGF, YTNSFTRGV                                                                                                                                                                                      |
|   |     |      | HLA-C*14 | SVLHSTQDL, YYHKNNKSWM, GYLQPRFTL, CYGVSPSTKL, IYQAGSTPC, VFQTRAGCL, VFAQVKQIY, AYRFNGIGV, AYSNNSIAI, NFGAISSVL                                                                                            |
| E | 228 | 9-10 | HLA-A*02 | FLAFVVFLL, SVLLFLAFV, LFLAFVVFLL, VLLFLAFVV, FLAFVVFLLV, LLFLAFVVFL, SLVKPSFYV                                                                                                                            |

|   |     |      |          |                                                                                                                                                                                                                     |
|---|-----|------|----------|---------------------------------------------------------------------------------------------------------------------------------------------------------------------------------------------------------------------|
|   |     |      | HLA-A*11 | NIVNVSLVK                                                                                                                                                                                                           |
|   |     |      | HLA-A*31 | RVKNLNSSR, SRVKNLNSSR                                                                                                                                                                                               |
|   |     |      | HLA-B*15 | LIVNSVLLF, LLFLAFVVF, VLLFLAFVVF, LVKPSFYVY, SLVKPSFYVY                                                                                                                                                             |
|   |     |      | HLA-B*51 | LAFVVFLLV, LAFVVFLLV                                                                                                                                                                                                |
|   |     |      | HLA-B*54 | FVVFLLVTLA                                                                                                                                                                                                          |
|   |     |      | HLA-C*01 | YVYSRVKNL                                                                                                                                                                                                           |
|   |     |      | HLA-C*07 | FYVYSRVKNL                                                                                                                                                                                                          |
|   |     |      | HLA-C*08 | IVNSVLLFL                                                                                                                                                                                                           |
| M | 668 | 9-10 | HLA-A*02 | KLLEQWNLV, FLFLTWICL, FVLAADVRI, IAMACLVGL, FLFLTWICLL, KLEQWNLVI, FLWLLWPVTL, TLACFVLA, LVIGFLFLT, FLYIILKILF, SMWSFNPET, FLWLLWPVT, IFLWLLWPV, VTLACFVLA, GLMWLSYFI, LIFLWLLWPV, TLACFVLA, VGLMWLSYFI, GLMWLSYFIA |
|   |     |      | HLA-A*11 | GTITVEELKK, YSRYRIGNYK, ATSRTLSTY, LSYFIASFR, TSRTLSTYK, ATSRTLSTYK                                                                                                                                                 |
|   |     |      | HLA-A*24 | QWNLVIGFLF, LWLLWPVTL, SYFIASFR, YYKLGASQVR, MWLSYFIASF, RFLYIILKILF, LSYFIASFR, LLWPVTLACF, YFIASFRF, LYIILKILFW, SYFIASFRF                                                                                        |
|   |     |      | HLA-A*26 | YSRYRIGNY, TVATSRTLSTY, CLVGLMWLSY, DSGFAAYSRY                                                                                                                                                                      |
|   |     |      | HLA-A*31 | RIAGHHLGR, AVILRGHLR, WLSYFIASFR, GFAAYSRYR, SFRLFARTR, SGFAAYSRYR, ASRLFARTR, IASRLFAR, FIASRLFAR                                                                                                                  |
|   |     |      | HLA-A*33 | YYKLGASQR, CFVLAADVYR, SYKLGASQR, LVIGAVILR, QFAYANRNR, LLQFAYANR                                                                                                                                                   |

|   |      |      |          |                                                                      |
|---|------|------|----------|----------------------------------------------------------------------|
|   |      |      | HLA-B*15 | LEQWNLVIGF, WLSYFIASF, SQRVAGDSGF, RLFARTRSM, FRLFARTRSM             |
|   |      |      | HLA-B*35 | FAYANRNRF, YANRNRFLY, LPKEITVAT, VATSRTLSY, WICLLQFAY                |
|   |      |      | HLA-B*40 | LESELVIGA, SELVIGAVI, ESELVIGAVI, LESELVIGAV, SELVIGAVIL             |
|   |      |      | HLA-B*44 | EELKKLLEQW                                                           |
|   |      |      | HLA-B*46 | FLYIIKLIF, FARTRSMWSF, FLTWICLLQF, LACFVLAAYV                        |
|   |      |      | HLA-B*51 | WPVTLACFVL, LWPVTLACFV, IAIAMACLV, WPVTLACFV, GIAIAMACLV, IAIAMACLVG |
|   |      |      | HLA-B*52 | INWITGGIAI, LNVPLHGTI, IGFLFTWI, WSNPETNI                            |
|   |      |      | HLA-B*54 | LMWLSYFIA                                                            |
|   |      |      | HLA-C*01 | NVPLHGTL, ITVATSRTL, FAAYSRYRI, FAYANRNRFL                           |
|   |      |      | HLA-C*07 | ARTRSMWSF, SRTLSYYKL, RYRIGNYKL, NRNRFLYII                           |
|   |      |      | HLA-C*08 | MADSNGTITV                                                           |
|   |      |      | HLA-C*14 | SFNPETNIL, SYYKLGASQ, AYANRNRFL                                      |
| N | 1260 | 9-10 | HLA-A*02 | NTASWFTAL, LLDRLNQLb, QQTVTLPA, FGMSRIGMEVb                          |
|   |      |      | HLA-A*11 | ATEGALNTPK, KTFPPTEPK, KTFPPTEPKK, YKTFPPTEPK, ASAFFGMSR, SASAFFGMSR |
|   |      |      | HLA-A*24 | YYRRATRRI, QFAPSASAFF                                                |
|   |      |      | HLA-A*26 | SSPDDQIGYY, DLSPRWYFY, ELIRQGTDY, FAPSASAFF, DLSPRWYFY               |



|      |     |      |          |                                                                                                                                                       |
|------|-----|------|----------|-------------------------------------------------------------------------------------------------------------------------------------------------------|
|      |     |      | HLA-A*31 | RSGARSKQR, SSRSRNSSR, SSRGTSPAR, ASKKPRQKR, AYNVTQAFGR, SSRSSRSR, GYYRRATTR, IGYRRATR                                                                 |
|      |     |      | HLA-A*33 | NVTQAFGRR, QIGYYRRATR                                                                                                                                 |
|      |     |      | HLA-B*07 | APRITFGGPS, RPQGLPNNTA, FPRGQGVPI, RNPANNAIV, KKPRQKRTAT, KPRQKRTAT, KPRQKRTATK, SPRWYFYLL, KFPRGQGVPI, LSPRWYFYLL, FPRGQGVPI, SPRWYFYLLG, APSASAFFGM |
|      |     |      | HLA-B*15 | GTGPEAGLPY, RQKRTATKAY, KAYNVTQAF, LLNKHIDAY, AQFAPSASAF                                                                                              |
|      |     |      | HLA-B*35 | MAGNGGDAAL, LPAADLDDF, TPSGTWLT, VTPSGTWLT, LPNNTASWF                                                                                                 |
|      |     |      | HLA-B*44 | QELIRQGT, MEVTPSGTW, MEVTPSGTWL, GMEVTPSGTW                                                                                                           |
|      |     |      | HLA-B*46 | KAYNVTQAF, TKAYNVTQAF                                                                                                                                 |
|      |     |      | HLA-B*51 | LPYGANKDGI                                                                                                                                            |
|      |     |      | HLA-B*52 | LQLPQGTT, TDYKHWPQI, SAFFGMSRI                                                                                                                        |
|      |     |      | HLA-C*01 | LTYTGAIKL                                                                                                                                             |
|      |     |      | HLA-C*03 | PANNAIVL, AGNGGDAAL, EVTPSGTWL                                                                                                                        |
|      |     |      | HLA-C*07 | QRNAPRITF, FYLLGTGPE, KHWPQIAQF, QFAPSASAF                                                                                                            |
|      |     |      | HLA-C*14 | YYLGTGPEA, IWWATEGAL, FFGMSRIGM, TWLTYTGAI, NFKDQVILL, KKADETQAL                                                                                      |
| ORF6 | 186 | 9-10 | HLA-A*02 | HLVDFQVTI, LIIMRTFKV, FHLVDFQVTI                                                                                                                      |
|      |     |      | HLA-A*11 | LLIIMRTFK                                                                                                                                             |

|       |     |      |          |                                              |
|-------|-----|------|----------|----------------------------------------------|
|       |     |      | HLA-B*52 | LDYIINLII                                    |
|       |     |      | HLA-C*08 | VSIWNLDYI                                    |
| ORF8  | 366 | 9-10 | HLA-A*02 | YVDDPCPI, YIDIGNYTV, YTVSCLPFTI, YTVSCLPFT   |
|       |     |      | HLA-A*11 | FTINCQEPK                                    |
|       |     |      | HLA-A*24 | FYSKWYIRV, NYTVSCLPF                         |
|       |     |      | HLA-A*26 | GIITTVAAF                                    |
|       |     |      | HLA-A*31 | KWYIRVGAR, HFYSKWYIR, HFYSKWYIRV, IHFYSKWYIR |
|       |     |      | HLA-B*52 | IHFYSKWYI                                    |
|       |     |      | HLA-B*54 | FLGIITTVAA, LPFTINCQE, LGIITTVAA             |
|       |     |      | HLA-C*01 | AAFHQECSL, VGARKSAPL                         |
|       |     |      | HLA-C*07 | FYEDFLEYH, EYHDVRVVL, VRCSFYEDF              |
|       |     |      | HLA-C*14 | SFYEDFLEY                                    |
| ORF10 | 116 | 9-10 | HLA-A*02 | AQVDVVNFNL, FAFPFTIYSL                       |
|       |     |      | HLA-A*11 | TIYSLLLCR                                    |
|       |     |      | HLA-A*24 | GYINVFAFPF                                   |
|       |     |      | HLA-A*33 | LLLCRMNSR, FTIYSLLLCR                        |
|       |     |      | HLA-B*15 | YIAQVDVVNF                                   |

|          |                                            |
|----------|--------------------------------------------|
| HLA-B*35 | YINVFAFPF, MGYINVFAF, FAFPFTIYS, FPFTIYSSL |
| HLA-B*51 | FPFTIYSLLL, AFPFTIYSSL                     |
| HLA-B*52 | NVFAFPFTI, INVFAFPFTI                      |
| HLA-C*01 | AFPFTIYSL                                  |
| HLA-C*14 | VFAFPFTIY, IYSLLLCRM                       |

---

### Supplementary Material III

Distribution of the Bahia sequences (n=743) in the Global Initiative on Sharing All Influenza Data (GISAID) and Phylogenetic Assignment of Named Global Outbreak LINEages clades (PANGOLIN).

| GISAID clade# | Count of sequences | Pangolin                                                                                                                                                 |
|---------------|--------------------|----------------------------------------------------------------------------------------------------------------------------------------------------------|
| S             | 1                  | <b>A.1 = 1</b>                                                                                                                                           |
| GRY           | 44                 | <b>B.1.1.7 = 44</b>                                                                                                                                      |
| V             | 2                  | <b>C.14 = 2</b>                                                                                                                                          |
| G             | 2                  | <b>AY.99.2 = 1</b><br>B.1.525 = 1                                                                                                                        |
| L             | 1                  | B.3 = 1                                                                                                                                                  |
| GH            | 88                 | <b>B.1 = 13</b><br>B.1.1.28 = 75                                                                                                                         |
| GR            | 605                | <b>B.1.1 = 14</b><br>B.1.1.33 = 79<br>B.1.1.378 = 3<br>N.1 = 1<br>N.9 = 12<br>P.1 = 361<br>P.1.14 = 10<br>P.1.2 = 2<br>P.1.7 = 4<br>P.2 = 118<br>P.7 = 1 |
| Total         | 743                | 743                                                                                                                                                      |

Bold fonts indicate the major distribution. #Clade information not available as on September 1, 2021, for the number of strains depicted in the bracket. GISAID: Global Initiative on Sharing All Influenza Data; PangoLIN: Phylogenetic Assignment of Named Global Outbreak LINEages.
